# Supplementary material for: Electrospun Filaments Embedding Bioactive Glass Particles with Ion Release and Enhanced Mineralization
Source: MDPI journal article supplement (doi:10.3390/nano9020182), 2019-02-01
Supplement: s1 [file s1]

# Electrospun filaments embedding bioactive glass particles with ion release and enhanced mineralization

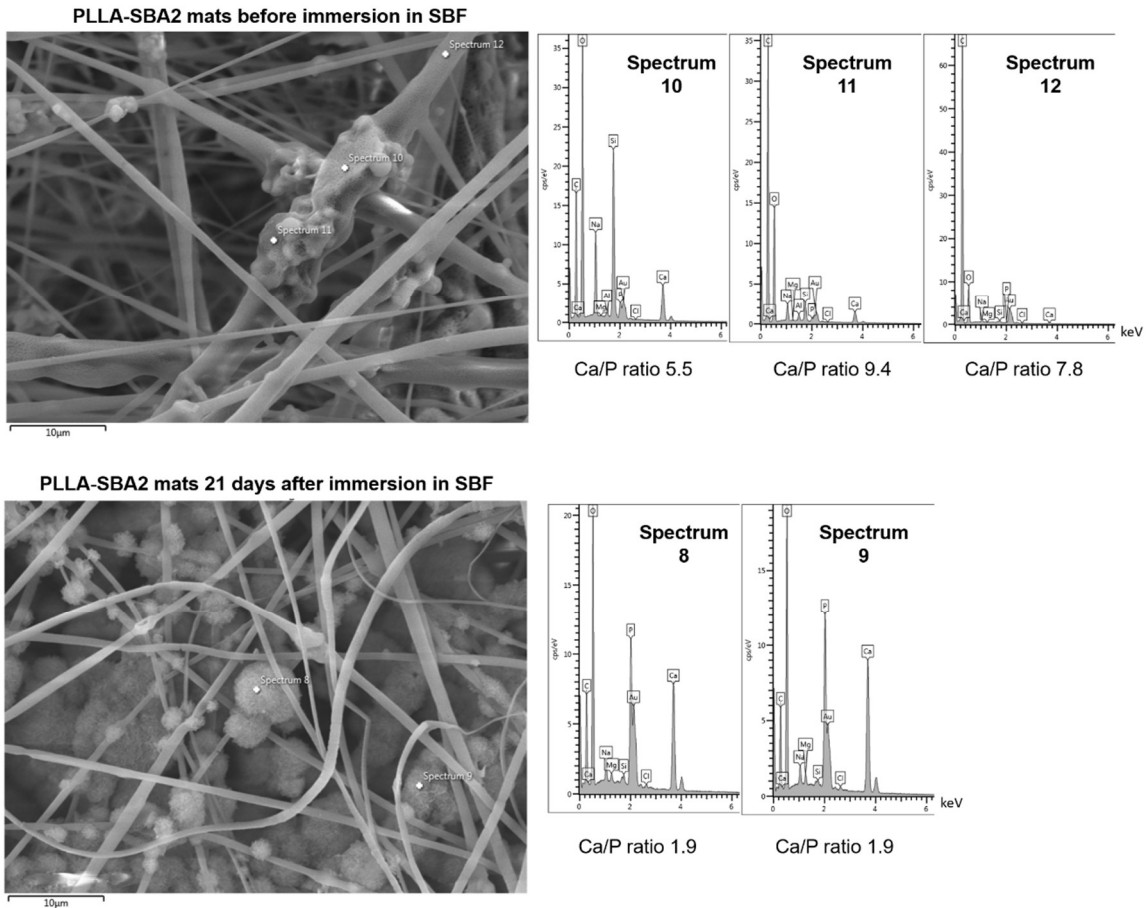

Figure S1. EDS analysis performed on PLLA-SBA2 sample before (top) and after 21 days of immersion in SBF solution (bottom).

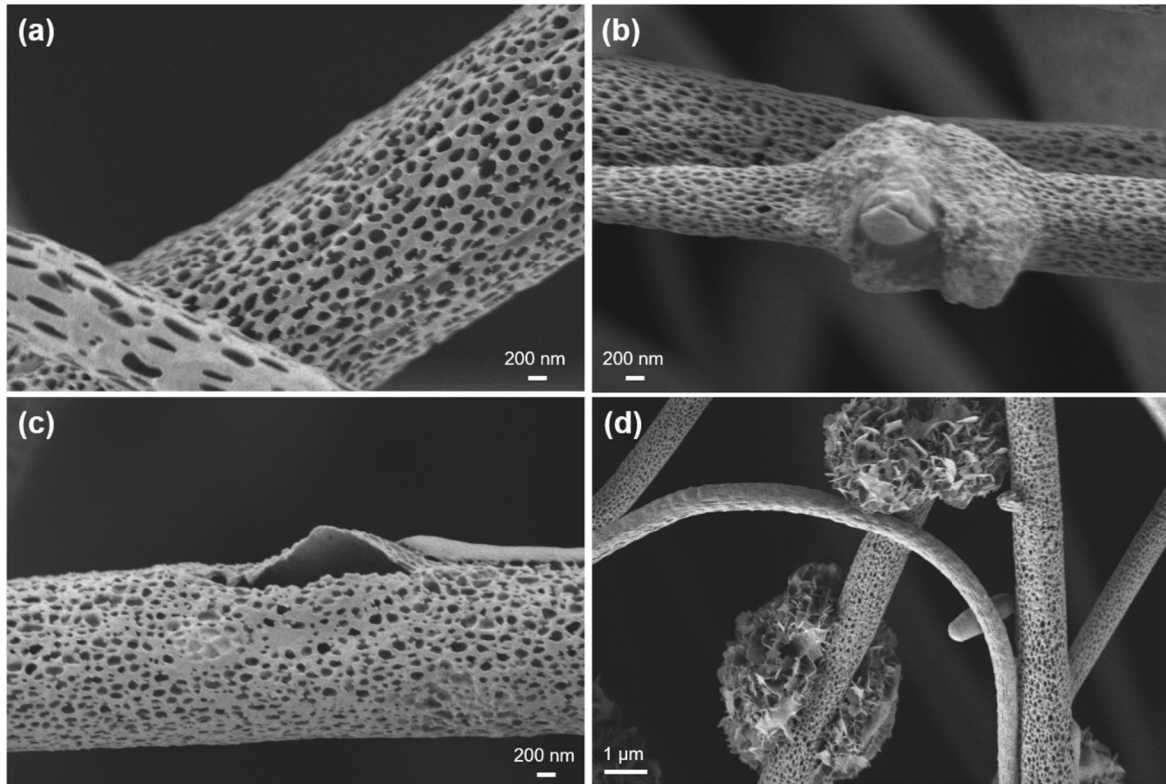

**Figure S2.** SEM micrographs of neat PLLA fibers (a), composite PLLA-SBA2 fibers (b), composite fibers after 7 days in PBS (c) and 21 days in SBF (d).
